# Supplementary material for: SARS-CoV-2 entry into human airway organoids is serine protease-mediated and facilitated by the multibasic cleavage site
Source: eLife journal article supplement (doi:10.7554/elife.64508), 2021-01-04
Supplement: supp [file elife_poa_e64508_Figure_1_figure_supplement_1.pdf › elife_poa_e64508_Figure_1_figure_supplement_1.pdf]

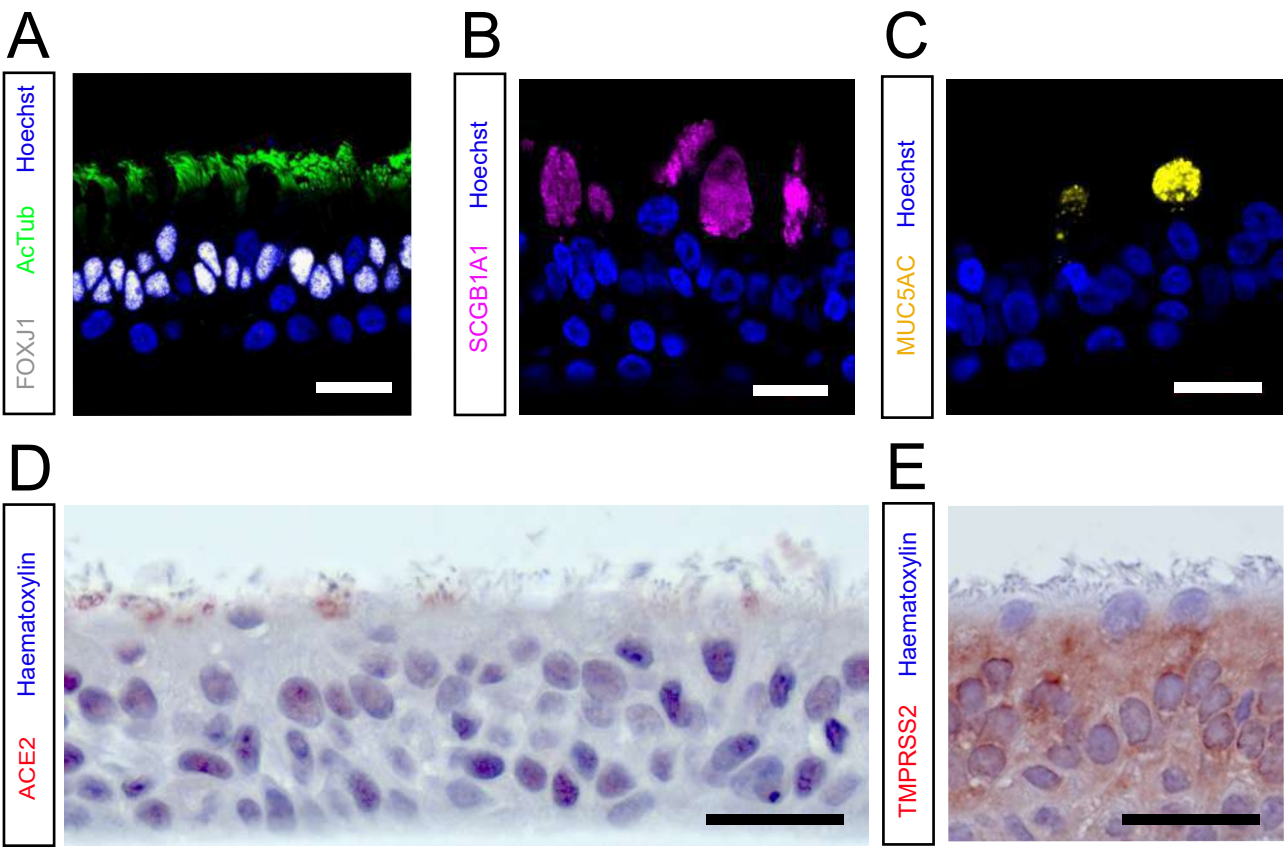

**Figure 1-figure supplement 1.** Human airway organoid cultures grown at 2D air-liquid interface are well-differentiated and express ACE2 and TMPRSS2. **(A, B and C)** Immunofluorescent or immunohistochemistry staining of differentiated airway cultures. Anti-AcTub (green) and anti-FOXJ1 (white) stains ciliated cells **(A)**, anti-SCGB1A1 (magenta) stains club cells **(B)** and anti-MUC5AC (yellow) stains goblet cells **(C)**. Nuclei are stained with hoechst (blue). **(D and E)** hAO cultures also expressed the SARS-CoV-2 entry receptor ACE2 **(D)** and TMPRSS2 **(E)**. Haematoxylin was used as a counterstain in **(D)** and **(E)**. Scale bars indicate 20 µm. Representative images are shown from a bronchiolar culture.
