# Supplementary material for: SARS-CoV-2 entry into human airway organoids is serine protease-mediated and facilitated by the multibasic cleavage site
Source: eLife journal article supplement (doi:10.7554/elife.64508), 2021-01-04
Supplement: supp [file elife_poa_e64508_Figure_2_figure_supplement_1.pdf › elife_poa_e64508_Figure_2_figure_supplement_1.pdf]

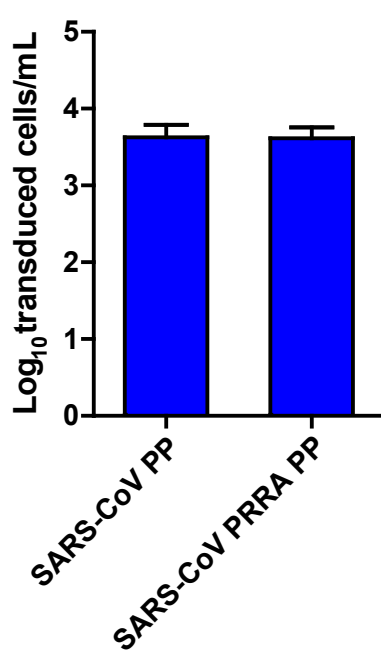

**Figure 2-figure supplement 1.** SARS-CoV PP infectivity into Calu-3 cells is not altered by the insertion of the multibasic cleavage site. Titrations of SARS-CoV PPs and SARS-PRRA PPs on Calu-3 cells. PP=pseudoparticles. Error bars indicate SEM. A representative experiment in triplicate from three independent experiments is shown.
